# Supplementary material for: "Combined Diagnostic Tool" APPlication to a Retrospective Series of Patients Undergoing Total Joint Revision Surgery
Source: PubMed Central journal article supplement — J Bone Jt Infect. 2017 Feb 4;2(2):107–13. doi: 10.7150/jbji.18308 (PMC5441141; doi:10.7150/jbji.18308), 2017-02-04
Supplement: jbjiv02p0107s1.pdf [file jbjiv02p0107s1.pdf]

## SUPPLEMENTARY MATERIAL

Table S1. List of tests with reference values of each examination included in CDT app

| Diagnostic marker                                           | Site         | Cut-off value                     | Sensitivity | Specificity | Reference |
|-------------------------------------------------------------|--------------|-----------------------------------|-------------|-------------|-----------|
| <b>Serum Markers</b>                                        |              |                                   |             |             |           |
| CRP                                                         | Hip and Knee | That of reference lab             | 0.880       | 0.870       | 1         |
|                                                             | Knee         | 16.5 mg/L                         | 0.760       | 0.930       | 2         |
| ESR                                                         | Hip and Knee | That of reference lab             | 0.750       | 0.740       | 1         |
| WBC                                                         | Hip and Knee | That of reference lab             | 0.450       | 0.700       | 1         |
| Interleukin-6                                               | Hip and Knee | That of reference lab             | 0.970       | 0.910       | 1         |
| Procalcitonin                                               | Hip and Knee | 0.3 ng/ml                         | 0.33        | 0.98        | 3         |
| TNF-alpha                                                   | Hip and Knee | 40 ng/ml                          | 0.43        | 0.94        | 3         |
| Staphylococcal polysaccharide ELISA                         | Hip and Knee | 0,35 ELISA units                  | 0.897       | 0.951       | 4         |
| <b>Joint Aspiration</b>                                     |              |                                   |             |             |           |
| Cultural examination                                        | Hip          |                                   | 0.86        | 0.94        | 5         |
|                                                             | Hip and Knee |                                   | 0.563       | 0.981       | 6         |
| Synovial WBC                                                | Hip          | 3000 cells $\mu$ L                | 0.86        | 0.99        | 5         |
| Synovial Neutrophil count                                   | Hip          | 80%                               | 0.89        | 0.85        | 5         |
| Synovial CRP                                                | Knee         | 0.06 mg/L                         | 0.700       | 1.000       | 2         |
|                                                             | Knee         | 3.7 mg/L                          | 0.840       | 0.970       | 2         |
| Synovial PCR                                                | Hip and Knee |                                   | 0.44        | 0.94        | 7         |
| <b>Imaging techniques</b>                                   |              |                                   |             |             |           |
| Three Phase Bone scan                                       | Hip          |                                   | 0.88        | 0.9         | 8         |
| AGS with monoclonal antibodies                              | Hip and Knee |                                   | 0.830       | 0.800       | 9         |
| In-111-labeled leukocyte                                    | Hip and Knee |                                   | 0.770       | 0.770       | 10        |
| FDG-PET                                                     | Hip          |                                   | 0.826       | 0.898       | 11        |
|                                                             | Knee         |                                   | 0.904       | 0.748       | 11        |
| Sonography                                                  | Hip          | Capsule-to-bone distance < 3.2 mm | 0.999       | 0.770       | 12        |
| Spiral CT (Bone)                                            | Hip          |                                   | 0.75        | 0.3         | 13        |
| Spiral CT (Soft tissues)                                    | Hip          |                                   | 0.999       | 0.87        | 13        |
| Infra-red telethermography                                  | Knee         | 1°C                               | 0.890       | 0.91        | 14        |
| <b>Intra-operative findings (Histology; frozen section)</b> |              |                                   |             |             |           |
| Feldman criterion                                           | Hip and Knee | 5 PMN in 5 separate fields        | 0.29        | 0.95        | 15        |
| Athanasou criterion                                         | Hip          | 1 PMN in 1 high power field       | 0.714       | 0.642       | 16        |
| <b>Post-operative findings</b>                              |              |                                   |             |             |           |
| Periprosthetic tissue culture                               | Hip and Knee | 1 or more positive culture        | 0.734       | 0.909       | 6         |
|                                                             | Hip and Knee | 2 or more positive culture        | 0.608       | 0.992       | 6         |
| Sonication of retrieved implants                            | Hip and Knee | 5 or more CFU                     | 0.785       | 0.988       | 6         |
| DTT treatment of implants                                   | Hip and Knee | 5 or more CFU                     | 0.857       | 0.941       | 17        |
| Intra-operative cultures                                    | Hip and Knee | 1 or more positive culture        | 0.83        | 0.81        | 18        |
|                                                             | Hip and Knee | 2 or more positive culture        | 0.71        | 0.97        | 18        |
|                                                             | Hip and Knee | 3 or more positive culture        | 0.65        | 0.996       | 18        |
|                                                             | Hip          |                                   | 0.94        | 0.97        | 5         |
| PCR                                                         | Hip and Knee |                                   | 0.86        | 0.91        | 19        |
| Histology                                                   | Hip and Knee |                                   | 0.94        | 0.94        | 20        |

**Key:** Serum C-reactive Protein (CRP), erythrocyte sedimentation rate (ESR), Polymerase Chain Reaction (PCR), White Blood Cell count (WBC), Tumor necrosis factor (TNF), Enzyme-linked immunosorbent assay (ELIZA), Antigranulocyte scintigraphy (AGS), computed tomography (CT), Dithiothreito

1. Berbari E, Mabry T, Tsaras G, Spangehl M, Erwin PJ, Murad MH, Steckelberg J Osmon D. Inflammatory blood laboratory levels as markers of prosthetic joint infection: a systematic review and meta-analysis. *J Bone Joint Surg Am* 2010 Sep 1;92(11):2102-9.
2. Parvizi J, McKenzie JC, Cashman JP. Diagnosis of periprosthetic joint infection using synovial C-reactive protein. *J Arthroplasty*. 2012 Sep;27(8 Suppl):12-6..
3. Bottner F, Wegner A, Winkelmann W, Becker K, Erren M, Götze C Interleukin-6, procalcitonin and TNF-alpha: markers of periprosthetic infection following total joint replacement. *J Bone Joint Surg Br* 2007;89(1): 94-9.
4. Artini M, Romanò C, Manzoli L, Scoarughi GL, Papa R, Meani E, Drago L, Selan L. Staphylococcal IgM enzyme-linked immunosorbent assay for diagnosis of periprosthetic joint infections. *J Clin Microbiol*. 2011 Jan;49(1):423-5.
5. Spangehl MJ, Masri BA, O'Connell JX, Duncan CP. Prospective analysis of preoperative and intraoperative investigations for the diagnosis of infection at the sites of two hundred and two revision total hip arthroplasties. *J Bone Joint Surg Am*. 1999 May;81(5):672-83
6. Trampuz A, Piper KE, Jacobson MJ, Hanssen AD, Unni KK, Osmon DR, Mandrekar JN, Cockerill FR, Steckelberg JM, Greenleaf JF, Patel R. Sonication of removed hip and knee prostheses for diagnosis of infection. *N Engl J Med*. 2007 Aug 16;357(7):654-63.
7. Gallo J, Kolar M, Dendis M, Loveckova Y, Sauer P, Zapletalova J, Koukalova D. Culture and PCR analysis of joint fluid in the diagnosis of prosthetic joint infection. *New Microbiol*. 2008;31(1):97-104.
8. Nagoya S, Kaya M, Sasaki M, Tateda K, Yamashita T Diagnosis of periprosthetic infection at the hip using triple-phase bone scintigraphy. *J Bone Joint Surg Br*. 2008 Feb;90(2):140-4
9. Pakos EE Trikalinos TA, Fotopoulos AD, Ioannidis JP. Prosthesis infection: diagnosis after total joint arthroplasty with antigranulocyte scintigraphy with 99mTc-labeled monoclonal antibodies--a meta-analysis. *Radiology*. 2007 Jan;242(1):101-8.
10. Dutton JA, Bird NJ, Skehan SJ, Peters AM. Evaluation of a 3-hour indium-111 leukocyte image as a surrogate for a technetium-99m nanocolloid marrow scan in the diagnosis of orthopedic infection. *Clin Nucl Med*. 2004 Aug;29(8):469-74.
11. Kwee TC, Kwee RM, Alavi A. FDG-PET for diagnosing prosthetic joint infection: systematic review and metaanalysis. *Eur J Nucl Med Mol Imaging*. 2008 Nov;35(11):2122-32.
12. van Holsbeeck MT, Eylon WR, Sherman LS, Lombardi TJ, Mezger E, Verner JJ, Schurman JR, Jonsson K. Detection of Infection in Loosened Hip Prostheses: Efficacy of Sonography. *AJR* 1994; 163:381-384.
13. Cyteval C, Hamm V, Sarrabere MP, Lopez FM, Maury P, Taourel P. Painful Infection at the Site of Hip Prosthesis: CT Imaging. *Radiology* 2002; 224/2:477-483.
14. Romanò CL, D'Anchise R, Calamita M, Manzi G, Romanò D, Sansone V. Value of digital telethermography for the diagnosis of septic knee prosthesis: a prospective cohort study. *BMC Musculoskelet Disord*. 2013 Jan 4;14:7.
15. Kanner WA, Saleh KJ, Frierson HF Jr. Reassessment of the usefulness of frozen section analysis for hip and knee joint revisions. *Am J Clin Pathol*. 2008 Sep;130(3):363-8
16. Bori G, Soriano A, García S, Mallofré C, Riba J, Mensa J. Usefulness of histological analysis for predicting the presence of microorganisms at the time of reimplantation after hip resection arthroplasty for the treatment of infection. *J Bone Joint Surg Am*. 2007 Jun;89(6):1232-7.
17. Drago L et al. Use of Dithiothreitol to Improve the Diagnosis of Prosthetic Joint Infections. *J Orthop Res* 2013.

18. Atkins BL, Athanasou N, Deeks JJ, Crook DW, Simpson H, Peto TE, McLardy-Smith P, Berendt AR. Prospective evaluation of criteria for microbiological diagnosis of prosthetic-joint infection at revision arthroplasty. The OSIRIS Collaborative Study Group. *J Clin Microbiol.* 1998 Oct;36(10):2932-9.
19. Qu X, Zhai Z, Li H, Li H, Liu X, Zhu Z, Wang Y, Liu G, Dai K. Polymerase chain reaction diagnosis of prosthetic joint infection. *J Clin Microbiol.* 2013 Jun 5.
20. Müller M, Morawietz L, Hasart O, Strube P, Perka C, Tohtz S. Diagnosis of periprosthetic infection following total hip arthroplasty--evaluation of the diagnostic values of pre- and intraoperative parameters and the associated strategy to preoperatively select patients with a high probability of joint infection. *J Orthop Surg Res.* 2008 Jul 21;3:31.
